# Supplementary material for: Interest in Illicit Purchase of Cigarettes Under a Very Low Nicotine Content Product Standard
Source: Oxford University Press journal article supplement (doi:10.1093/ntr/ntz159), 2019-08-28
Supplement: ntz159_suppl_supplementary_table.docx [file ntz159_suppl_supplementary_table.docx]

**Supplementary Table 1.** Interest in illicit purchase of cigarettes in control and VLNC groups

|  | Control group (*n*=855) | | VLNC group (*n*=857) | |
| --- | --- | --- | --- | --- |
|  | *n* | % | *n* | % |
| Interest in purchasing from a website |  |  |  |  |
| Not at all interested | 446 | 52.2 | 364 | 42.5 |
| A little interested | 124 | 14.5 | 116 | 13.5 |
| Somewhat interested | 144 | 16.8 | 174 | 20.3 |
| Very interested | 87 | 10.2 | 119 | 13.9 |
| Extremely interested | 54 | 6.3 | 84 | 9.8 |
| Interest in purchasing from a street vendor |  |  |  |  |
| Not at all interested | 549 | 64.2 | 437 | 51.0 |
| A little interested | 100 | 11.7 | 109 | 12.7 |
| Somewhat interested | 99 | 11.6 | 149 | 17.4 |
| Very interested | 65 | 7.6 | 98 | 11.4 |
| Extremely interested | 42 | 4.9 | 64 | 7.5 |
| Interest in purchasing from an Indian reservation |  |  |  |  |
| Not at all interested | 405 | 47.4 | 322 | 37.6 |
| A little interested | 117 | 13.7 | 103 | 12.0 |
| Somewhat interested | 149 | 17.4 | 191 | 22.3 |
| Very interested | 104 | 12.2 | 131 | 15.3 |
| Extremely interested | 80 | 9.4 | 110 | 12.8 |
